# Supplementary material for: Enhancer prediction in the human genome by probabilistic modelling of the chromatin feature patterns
Source: bioRxiv or medRxiv preprint supplement (doi:10.1101/804625), 2020-06-02

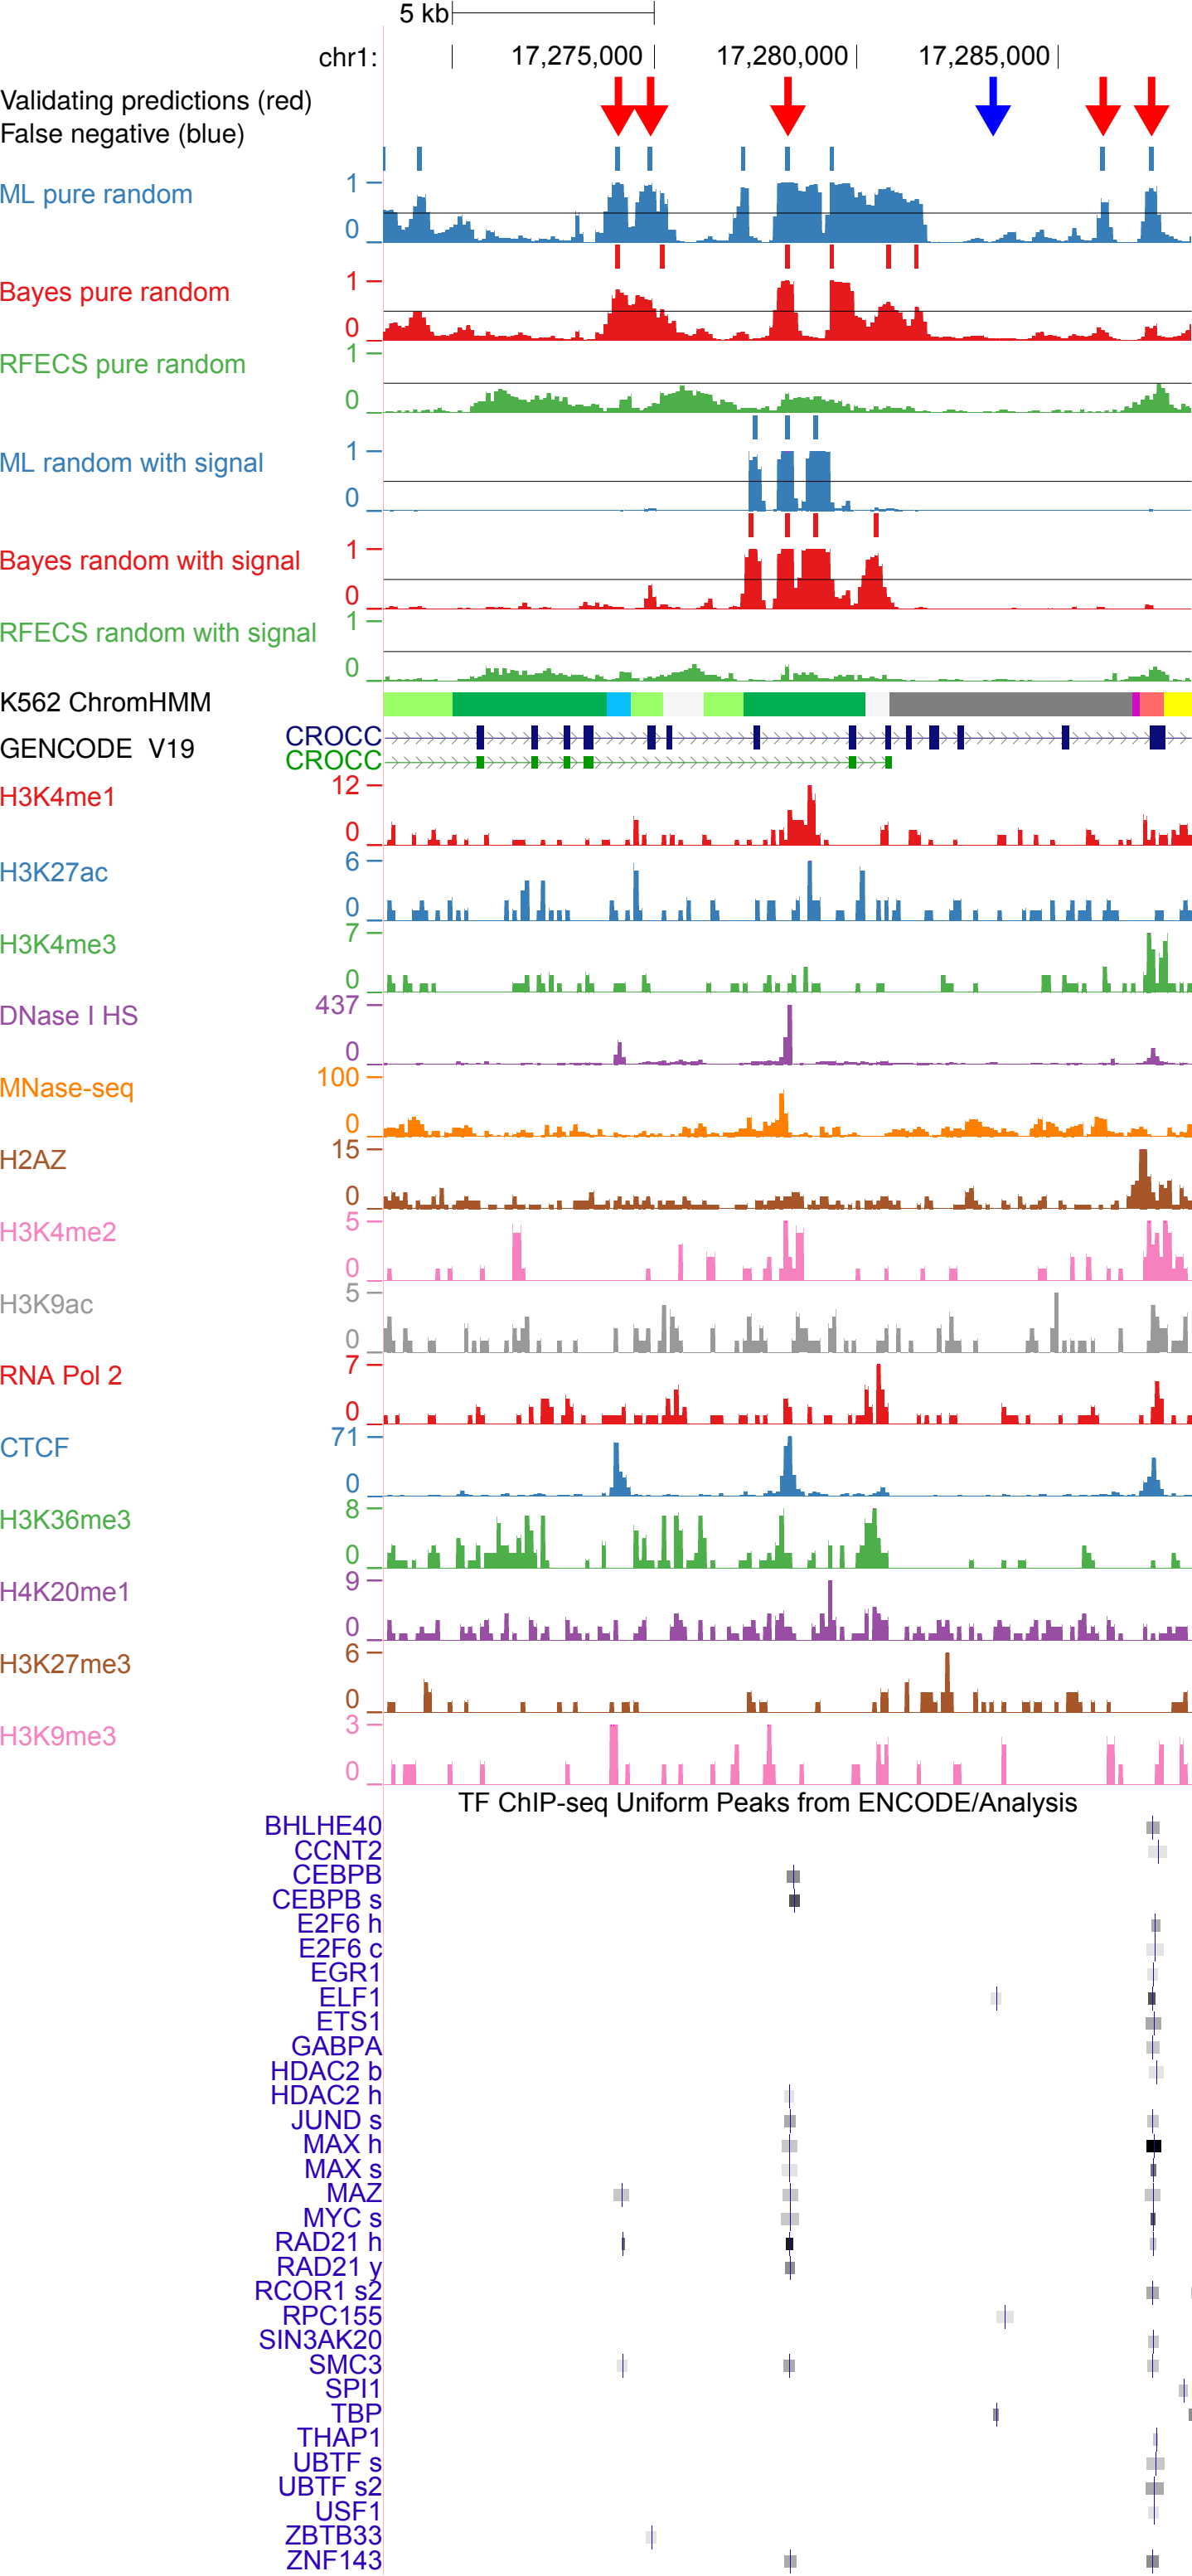

Supplement: Supplementary file [file media-3.pdf]
